# Supplementary material for: Transforming Growth Factor Beta and Epithelial to Mesenchymal Transition Alter Homologous Recombination Repair Gene Expression and Sensitize BRCA Wild-Type Ovarian Cancer Cells to Olaparib
Source: MDPI journal article supplement (doi:10.3390/cancers15153919), 2023-08-01
Supplement: s1 [file s1]

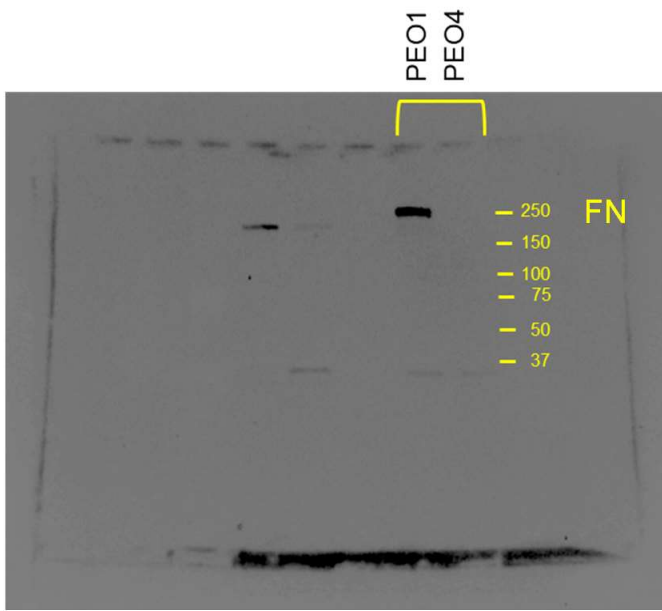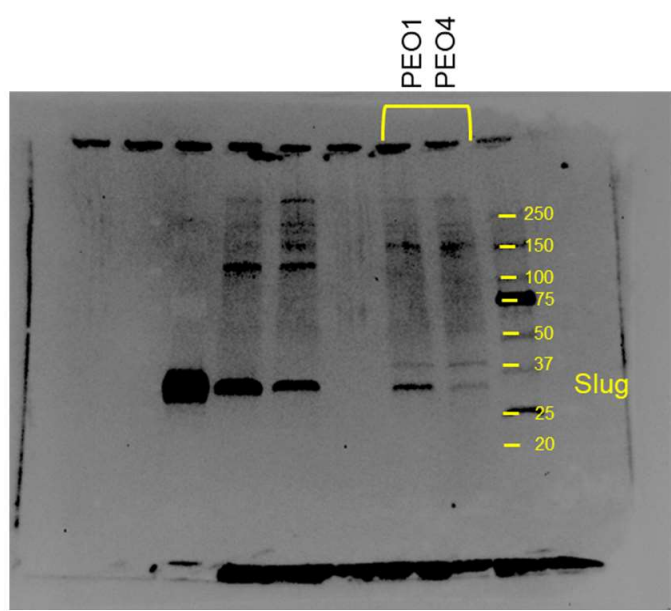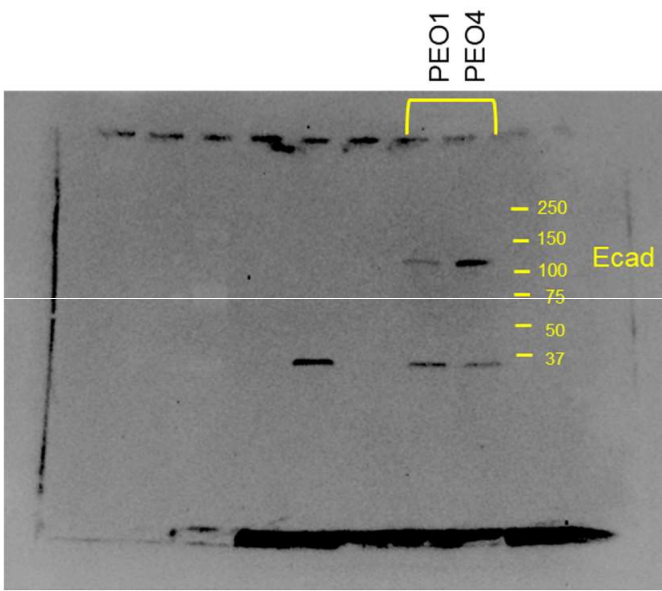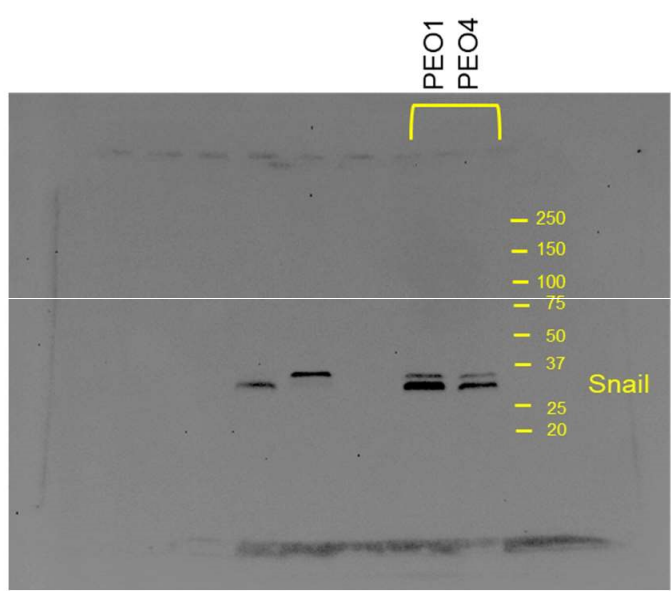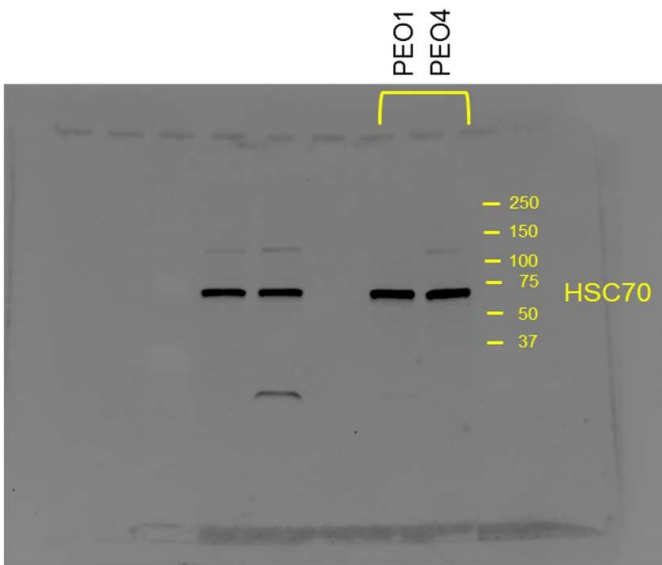

**Figure S1.** Full western blot images for Figure 1C

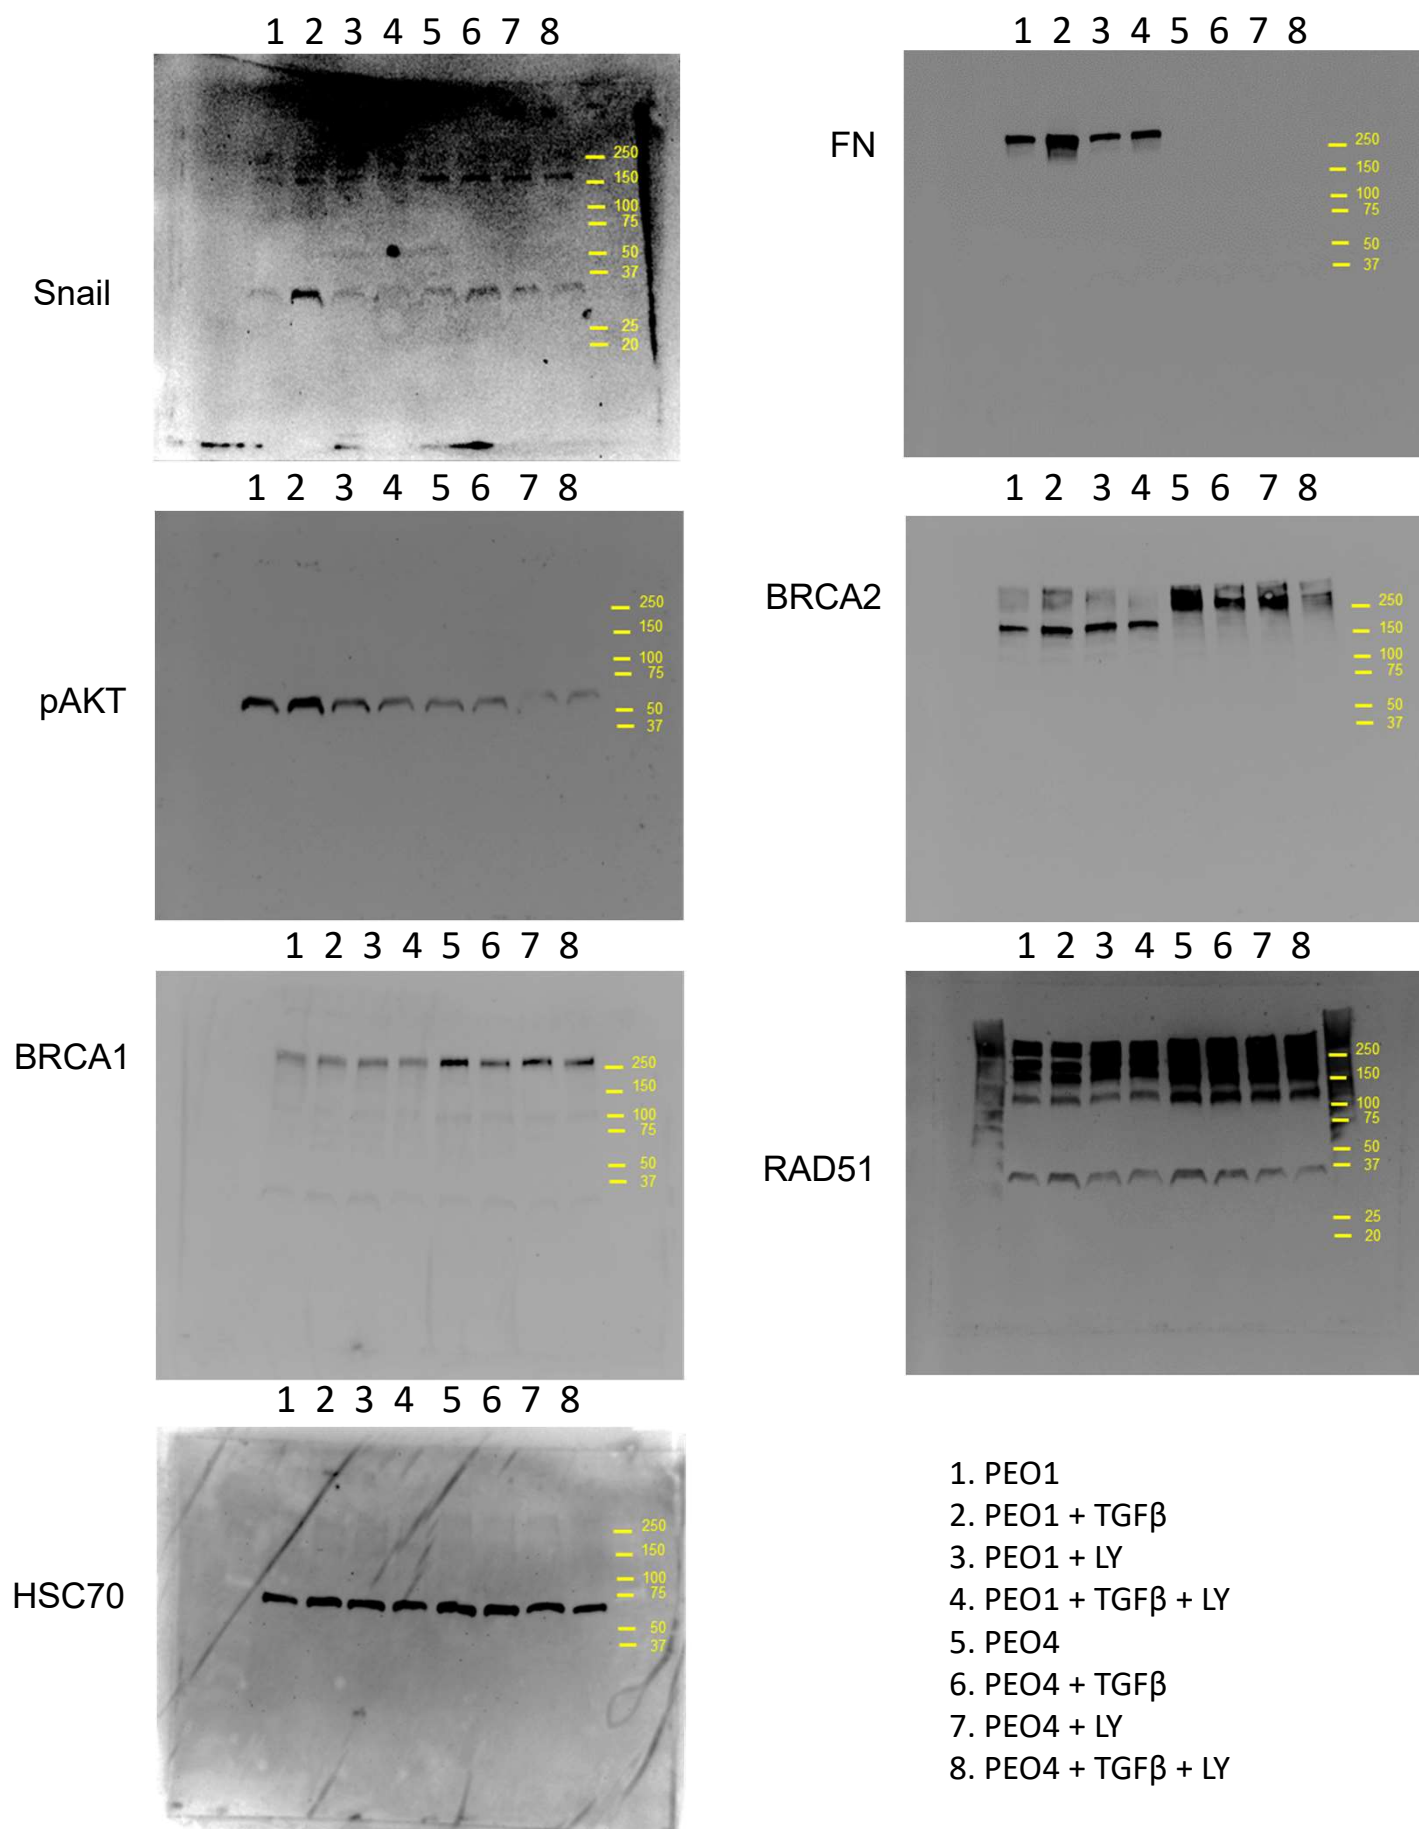

**Figure S2.** Full western blot images for Figure 2A

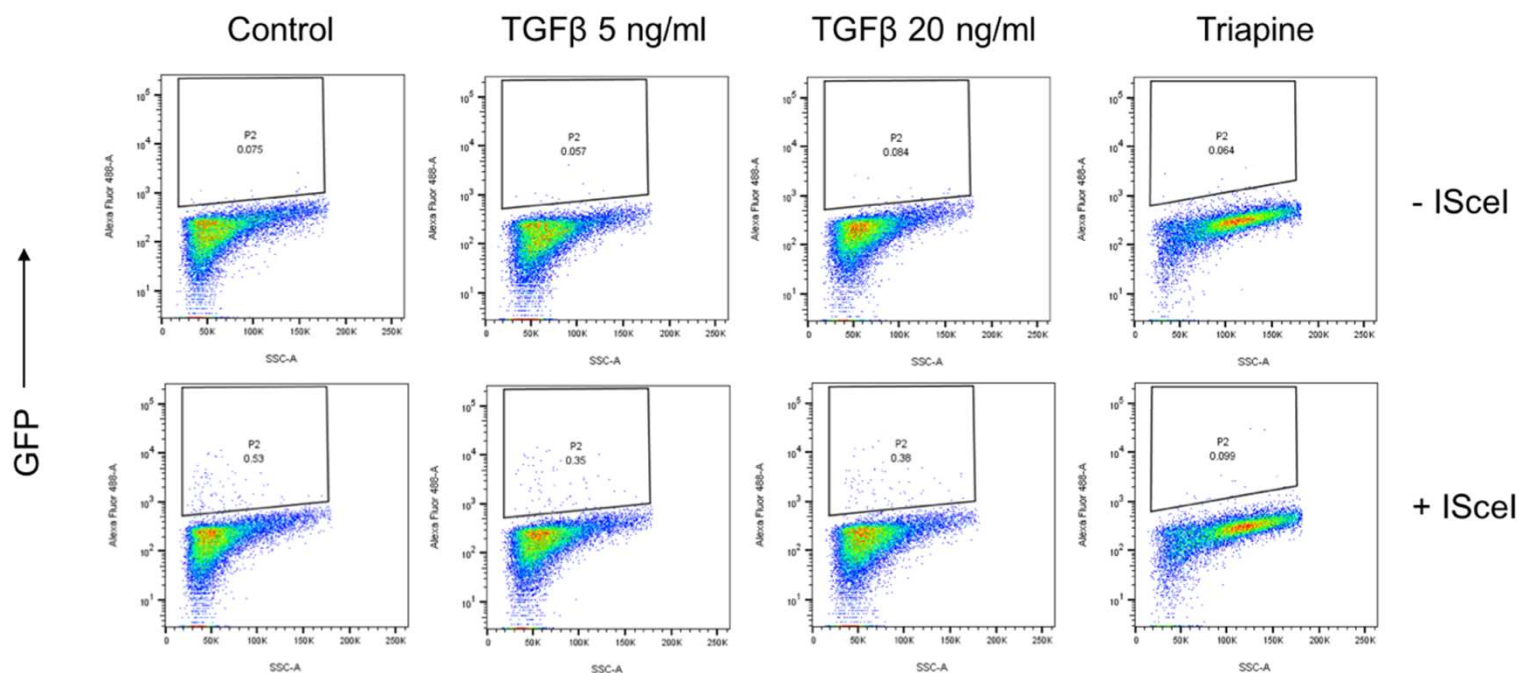

**Figure S3.** Representative flow cytometry data for experiment shown in Figure 2B.

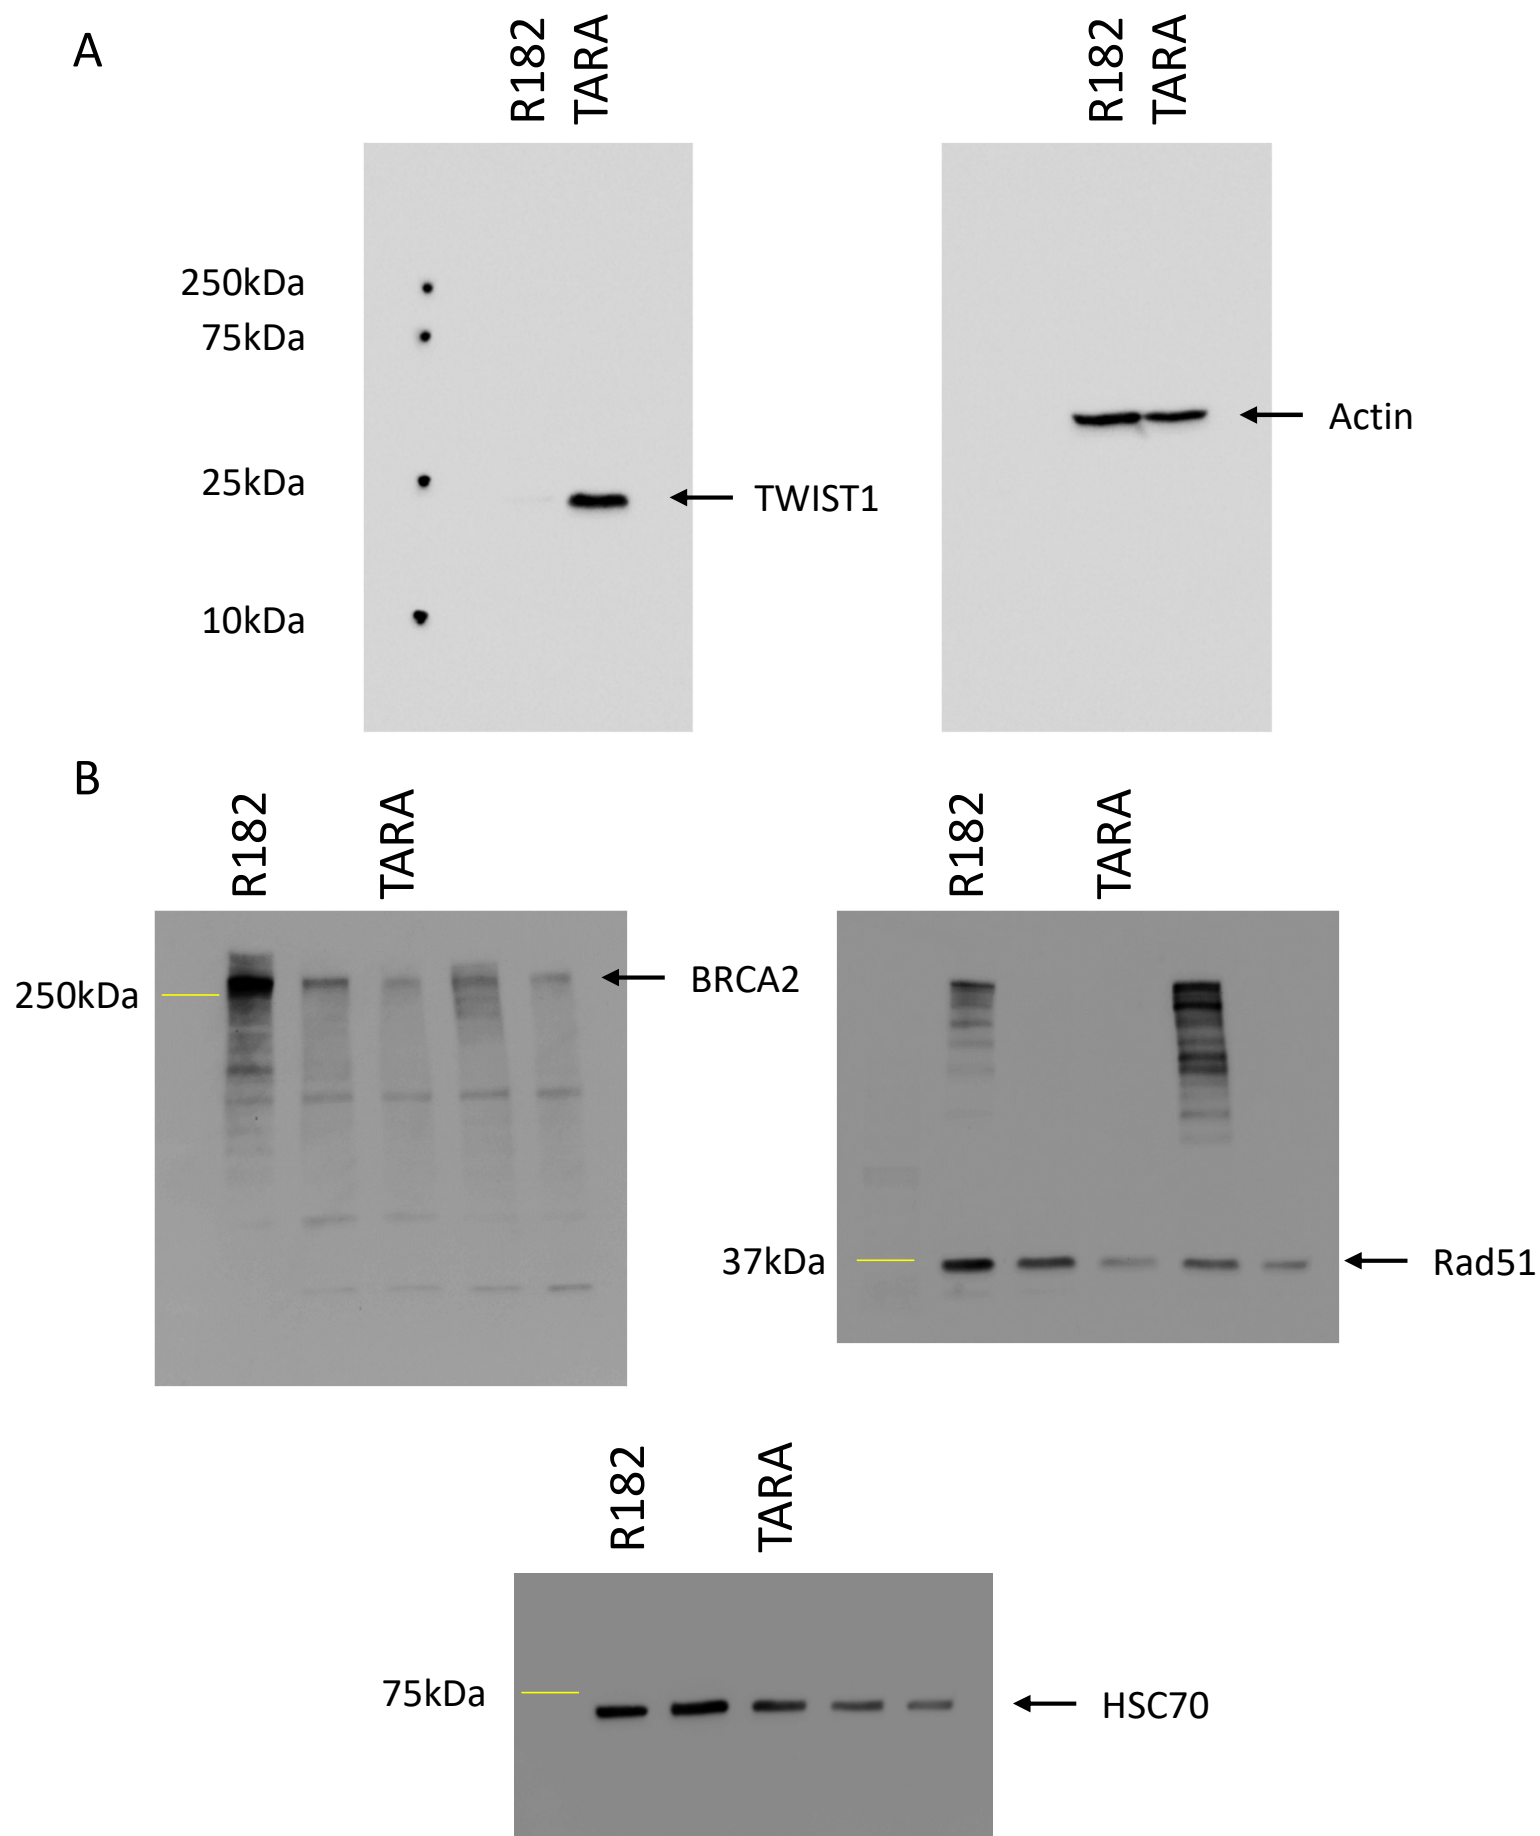

**Figure S4.** Full western blot images for data shown in **A.** Figure 3C and **B.** Figure 4A.

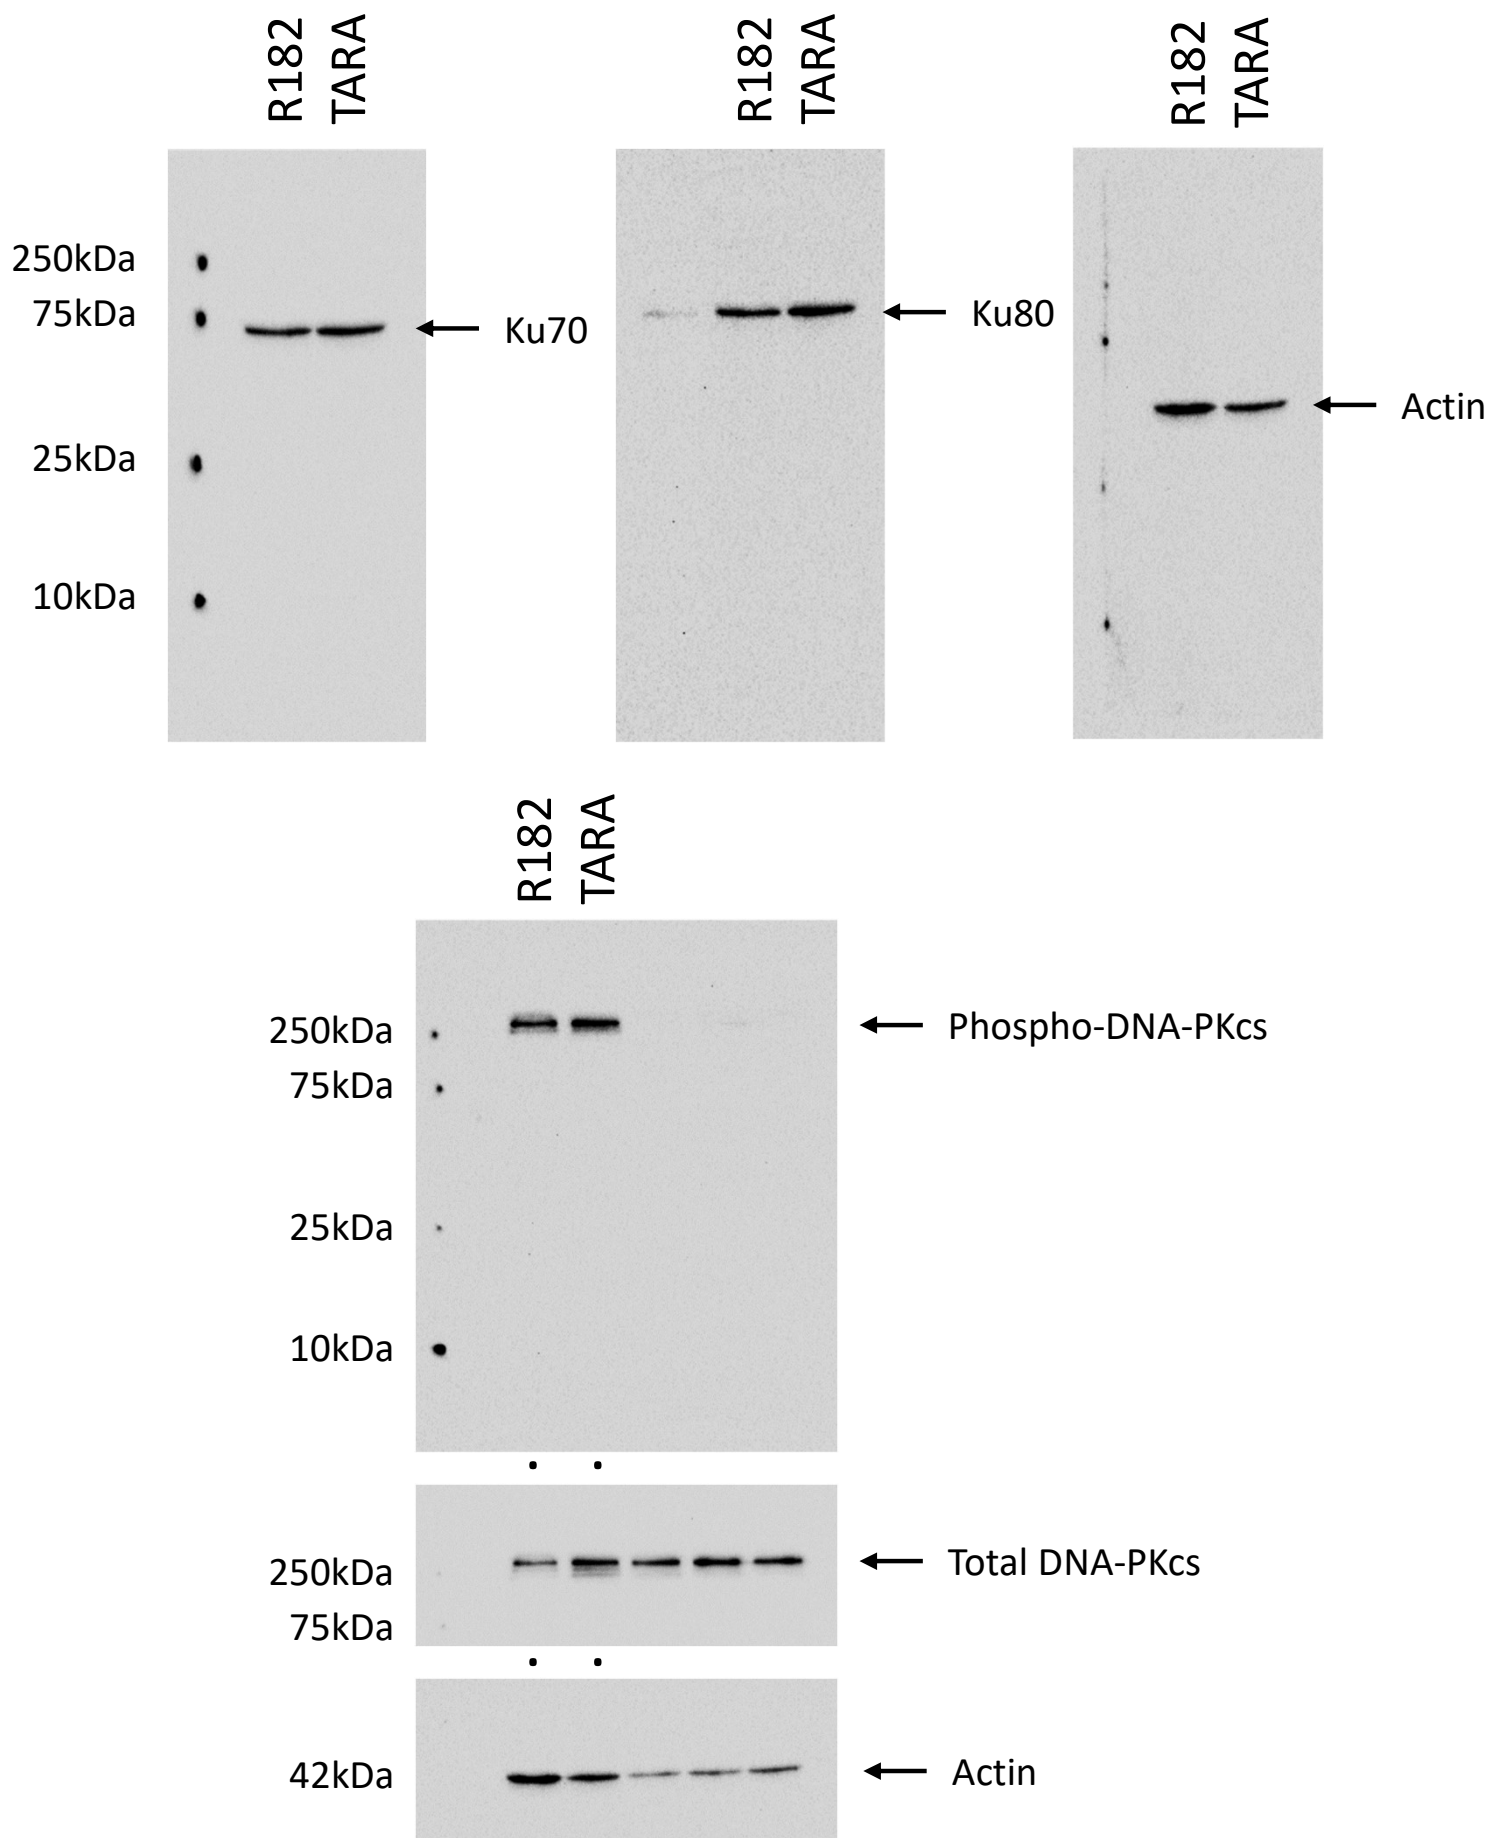

**Figure S5.** Full western blot images for data shown in Figure 4C.
